# Supplementary material for: Gene set enrichment for reproducible science: comparison of CERNO and eight other algorithms
Source: Oxford University Press journal article supplement (doi:10.1093/bioinformatics/btz447), 2019-05-31
Supplement: bioinformatics_35_24_5146_s6.zip [file bioinformatics_35_24_5146_s6.zip]

Archive with 11 entries (11 files):
- Supplement Figure 8.pdf
- SuplementaryFile_1.xlsx
- SuplementaryFile_2.xlsx
- SuplementaryFile_3.xlsx
- Supplement Figure 1.pdf
- Supplement Figure 2.pdf
- Supplement Figure 3.pdf
- Supplement Figure 4.pdf
- Supplement Figure 5.pdf
- Supplement Figure 6.pdf
- Supplement Figure 7.pdf
