# Supplementary material for: Gene set enrichment for reproducible science: comparison of CERNO and eight other algorithms
Source: Oxford University Press journal article supplement (doi:10.1093/bioinformatics/btz447), 2019-05-31
Supplement: bioinformatics_35_24_5146_s6.zip [file bioinformatics_35_24_5146_s6.zip › SuplementaryFile_1.xlsx]

## Sheet: Start_param
Algorithm	# of permutations	Gene set filtering (# of genes)	Gene ranking metric	R package
CERNO	-	<15 & >500	MSD	tmod
GeneSetTest	-	No filtering	|T-stat| for unequal variances	limma
GLOBALTEST	-	No filtering	algorithm internal metric	Globaltest
GSEA	1000	<15 & >500	Baumgartner-Weiss-Schindler	MrGSEA*
GSVA	-	<15 & >500	Not applicable	gsva
ORA	-	No filtering	p-values from t-test for unequal variances	GOStat
PADOG	1000	<15	algorithm internal metric	padog
PLAGE	-	<15 & >500	Not applicable	gsva
Wilcoxon GST	-	No filtering	|T-stat| for unequal variances	limma
* MATLAB implementation (Zyla et al. 2017b)
