# Supplementary material for: Gene set enrichment for reproducible science: comparison of CERNO and eight other algorithms
Source: Oxford University Press journal article supplement (doi:10.1093/bioinformatics/btz447), 2019-05-31
Supplement: bioinformatics_35_24_5146_s6.zip [file bioinformatics_35_24_5146_s6.zip › SuplementaryFile_2.xlsx]

## Sheet: Data_Set_Description
No	GEO	TargetGS	TargetGS size	Disease	Design	Annotation	Source	Sample Size (Case+Control)	Reference
1	GSE1145	hsa:05414	89	Dilated cardiomyopathy	unpaired	hgu133plus2	https://bioconductor.org/packages/release/data/experiment/html/KEGGandMetacoreDzPathwaysGEO.html	26 (11+15)	-
2	GSE14924_CD4	hsa:05221	57	Acute myeloid leukemia	unpaired	hgu133plus2		20 (10+10)	https://www.ncbi.nlm.nih.gov/pubmed/19710498
3	GSE14924_CD8	hsa:05221	57	Acute myeloid leukemia	unpaired	hgu133plus2		21 (11+10)	https://www.ncbi.nlm.nih.gov/pubmed/19710498
4	GSE16759	hsa:05010	168	Alzheimer's disease	unpaired	hgu133plus2		8 (4+4)	https://www.ncbi.nlm.nih.gov/pubmed/20126538
5	GSE24739_G0	hsa:05220	73	Chronic myeloid leukemia	unpaired	hgu133plus2		12 (4+8)	https://www.ncbi.nlm.nih.gov/pubmed/21436996
6	GSE24739_G1	hsa:05220	73	Chronic myeloid leukemia	unpaired	hgu133plus2		12 (4+8)	https://www.ncbi.nlm.nih.gov/pubmed/21436996
7	GSE32676	hsa:05212	66	Pancreatic cancer	unpaired	hgu133plus2		32 (7+25)	https://www.ncbi.nlm.nih.gov/pubmed/22261810	red color represents the datasets used in reproducibility investigation
8	GSE4183	hsa:05210	62	Colorectal cancer	unpaired	hgu133plus2		23 (8+15)	https://www.ncbi.nlm.nih.gov/pubmed/19461970
9	GSE23878	hsa:05210	62	Colorectal cancer	paired	hgu133plus2		38	https://www.ncbi.nlm.nih.gov/pubmed/21281787
10	GSE7305	hsa:05213	52	Endometrial cancer	paired	hgu133plus2		20	https://www.ncbi.nlm.nih.gov/pubmed/17640886
11	GSE1297	hsa:05010	168	Alzheimer's Disease	unpaired	hgu133a	http://bioconductor.org/packages/release/data/experiment/html/KEGGdzPathwaysGEO.html	16 (9+7)	https://www.ncbi.nlm.nih.gov/pubmed/14769913
12	GSE14762	hsa:05211	66	Renal Cancer	unpaired	hgu133plus2		21 (12+9)	https://www.ncbi.nlm.nih.gov/pubmed/19252501
13	GSE19188	hsa:05223	56	Non Small Cell Lung Cancer	unpaired	hgu133plus2		153 (62+91)	https://www.ncbi.nlm.nih.gov/pubmed/20421987
14	GSE19728	hsa:05214	65	Glioma	unpaired	hgu133plus2		21 (4+17)	-
15	GSE20153	hsa:05012	142	Parkinson's disease	unpaired	hgu133plus2		16 (8+8)	https://www.ncbi.nlm.nih.gov/pubmed/20926834
16	GSE20291	hsa:05012	142	Parkinson's disease	unpaired	hgu133a		33 (19+14)	https://www.ncbi.nlm.nih.gov/pubmed/15965975
17	GSE21354	hsa:05214	65	Glioma	unpaired	hgu133plus2		17 (4+13)	-
18	GSE3585	hsa:05414	89	Dilated cardiomyopathy	unpaired	hgu133a		12 (5+7)	https://www.ncbi.nlm.nih.gov/pubmed/17045896
19	GSE4107	hsa:05210	62	Colorectal Cancer	unpaired	hgu133plus2		22 (10+12)	https://www.ncbi.nlm.nih.gov/pubmed/17317818
20	GSE5281_EC	hsa:05010	168	Alzheimer's Disease	unpaired	hgu133plus2		21 (12+9)	https://www.ncbi.nlm.nih.gov/pubmed/17077275
21	GSE5281_HIP	hsa:05010	168	Alzheimer's Disease	unpaired	hgu133plus2		23 (13+10)	https://www.ncbi.nlm.nih.gov/pubmed/17077275
22	GSE5281_VCX	hsa:05010	168	Alzheimer's Disease	unpaired	hgu133plus2		31 (12+19)	https://www.ncbi.nlm.nih.gov/pubmed/17077275
23	GSE781	hsa:05211	66	Renal Cancer	unpaired	hgu133a		17 (5+12)	https://www.ncbi.nlm.nih.gov/pubmed/14641932
24	GSE8762	hsa:05016	193	Huntington's disease	unpaired	hgu133plus2		22 (10+12)	https://www.ncbi.nlm.nih.gov/pubmed/17724341
25	GSE9348	hsa:05210	62	Colorectal Cancer	unpaired	hgu133plus2		82 (12+70)	https://www.ncbi.nlm.nih.gov/pubmed/20143136
26	GSE9476	hsa:05221	57	Acute myeloid leukemia	unpaired	hgu133a		63 (37+26)	https://www.ncbi.nlm.nih.gov/pubmed/17910043
27	GSE15471	hsa:05212	66	Pancreatic Cancer	paired	hgu133plus2		70	https://www.ncbi.nlm.nih.gov/pubmed/19260470
28	GSE16515	hsa:05212	66	Pancreatic Cancer	paired	hgu133plus2		30	https://www.ncbi.nlm.nih.gov/pubmed/19732725
29	GSE18842	hsa:05223	56	Non Small Cell Lung Cancer	paired	hgu133plus2		88	https://www.ncbi.nlm.nih.gov/pubmed/20878980
30	GSE3467	hsa:05216	29	Thyroid Cancer	paired	hgu133plus2		18	https://www.ncbi.nlm.nih.gov/pubmed/16365291
31	GSE3678	hsa:05216	29	Thyroid Cancer	paired	hgu133plus2		14	-
32	GSE6956AA	hsa:05215	89	Prostate Cancer	paired	hgu133a		10	https://www.ncbi.nlm.nih.gov/pubmed/18245496
33	GSE6956C	hsa:05215	89	Prostate Cancer	paired	hgu133a		16	https://www.ncbi.nlm.nih.gov/pubmed/18245496
34	GSE8671	hsa:05210	62	Colorectal Cancer	paired	hgu133plus2		64	https://www.ncbi.nlm.nih.gov/pubmed/18171984
35	GSE6344	hsa:05211	66	Renal Cancer	unpaired	hgu133a	Jaakkola and Elo et al. (2016)	20 (9+11)	https://www.ncbi.nlm.nih.gov/pubmed/17699851
36	GSE15641	hsa:05211	66	Renal Cancer	unpaired	hgu133a		55 (23+32)	https://www.ncbi.nlm.nih.gov/pubmed/16115910
37	GSE14994	hsa:05211	66	Renal Cancer	unpaired	hgu133a		30 (8+22)	https://www.ncbi.nlm.nih.gov/pubmed/19470766
38	GSE11024	hsa:05211	66	Renal Cancer	unpaired	hgu133plus2		22 (12+10)	https://www.ncbi.nlm.nih.gov/pubmed/18519660
