# Supplementary material for: Gene set enrichment for reproducible science: comparison of CERNO and eight other algorithms
Source: Oxford University Press journal article supplement (doi:10.1093/bioinformatics/btz447), 2019-05-31
Supplement: bioinformatics_35_24_5146_s6.zip [file bioinformatics_35_24_5146_s6.zip › SuplementaryFile_3.xlsx]

## Sheet: Sens|FPR|TIME|PRIO
DATA				SENSITIVIT										FPR										TIME [s]										PRIORITIZATION [%]
GEO	target path KEGG ID	sampl size		PLAGE	GLOBALTEST	PADOG	ORA	GSEA	GSVA	GST	Wlicoxon GST	CERNO		PLAGE	GLOBALTEST	PADOG	ORA	GSEA	GSVA	GST	Wlicoxon GST	CERNO		PLAGE	GLOBALTEST	PADOG	ORA	GSEA	GSVA	GST	Wlicoxon GST	CERNO		PLAGE	GLOBALTEST	PADOG	ORA	GSEA	GSVA	GST	Wlicoxon GST	CERNO
GSE1145	hsa:05414	26		6.90608e-06	1.18036e-07	0.784	0.856366	0.0522379	0.523394	0.4742	0.453856	0.152841		1.73626	4.0262	5.37255	4.13423	5.38462	1.51648	7.78595	8.04013	17.1418		3.96	2.01	89.44	12.3	323.268	5.11	129.17	129.17	5.49		79.1209	19.6507	75.4902	85.6643	74.359	67.3993	79.9331	78.5953	53.8182
GSE14924_CD4	hsa:05221	20		1.31057e-07	9.05286e-06	0.004	0.00905466	0.000158062	0.721901	0.0007	0.00256863	0.000266914		2.01465	5.55459	4.62745	4.79473	5.50183	2.01465	6.86957	7.17726	21.0982		2.58	2.14	75.39	7.65	323.939	3.28	127.89	127.89	5.92		36.63	26.2009	4.41176	3.14685	2.1978	82.0513	4.01338	5.35117	4.72727
GSE14924_CD8	hsa:05221	21		7.03943e-05	0.000347404	0.008	0.0227414	0.00086037	0.992504	0.0015	0.00233958	0.0017097		1.0696	4.39301	5.36275	4.26228	5.42125	1.53846	8.71572	8.56856	20.3345		2.61	1.9	86.53	7.28	317.949	3.01	124.55	124.55	6.85		34.7985	28.821	5.63725	6.73759	4.0293	98.1685	5.18395	7.02341	6.90909
GSE16759	hsa:05010	8		0.573161	0.346844	0.188406	0.755969	0.0487472	0.156982	0.0037	8.9482e-05	0.0670484		0.300366	2.14847	5.79412	4.36652	11.2308	2.76923	11.4381	12.5084	10.9527		3.5	3.25	17.67	10.59	311.595	4.33	148.52	148.52	6.61		9.89011	20.9607	18.1373	74.8858	15.7509	8.79121	3.01003	1.67224	10.9091
GSE24739_G0	hsa:05220	12		0.0108341	0.000132743	0.0161943	0.00146203	3.68989e-05	0.400864	0.0003	0.000169743	0.000157693		4.29304	8.0524	4.85294	4.16426	6.00733	1.81685	9.38462	9.699	7.26545		3.09	2.3	46.16	7.2	319.365	4.58	143.59	143.59	6.8		1.8315	5.24017	2.20588	2.84698	5.14706	53.1136	7.35786	9.36455	4
GSE24739_G1	hsa:05220	12		0.779856	0.0428479	0.0182186	0.000240582	0.00124294	0.19853	0.0001	9.46035e-05	0.00168472		3.58974	5.17904	4.96078	4.35407	7.03297	1.86081	8.44147	8.64883	6.89455		3.59	2.47	50.97	9.97	319.971	5.27	143.06	143.06	6.21		16.4835	32.7511	5.88235	2.23048	5.12821	10.989	1.50502	2.34114	6.54545
GSE32676	hsa:05212	32		7.00009e-05	0.0001903	0.002	0.000116609	1	0.114265	0.0002	8.45098e-05	0.020145		1.72161	5.76419	4.85294	5.81949	11.2308	2.38828	9.95318	9.26421	3.84727		4.12	2.64	83.14	12.18	339.386	5.61	187.82	187.82	6.06		8.05861	24.8908	1.22549	0.361011	73.4615	16.8498	6.68896	4.34783	18.5455
GSE4183	hsa:05210	23		0.00875365	0.0037648	0.41	0.287775	0.00592893	0.168404	0.0286	0.0540764	0.0907883		1.32601	5.51965	5.0098	5.62863	7.9707	1.92674	8.78261	9.52508	18.64		3.72	2.06	89.81	11.75	322.417	4.6	148.21	148.21	6.03		73.6264	52.8384	42.8922	34.0351	29.6703	34.0659	41.1371	41.1371	53.4545
GSE1297	hsa:05010	16		0.0315758	0.0172686	0.067	0.000855469	0.00553203	0.0505723	0.0001	1.38144e-06	7.39212e-11		0.0149254	2.06114	5.09645	4.87471	6.96269	1.70149	7.13712	7.65217	5.68		4	1.44	50.33	11.84	195.506	4.56	102.77	102.77	4.95		20.5224	41.4847	5.58376	1.79856	2.62172	11.194	0.83612	1.33779	1.09091
GSE14762	hsa:05211	21		8.09722e-11	7.46333e-13	0.008	0.0129373	0.00508471	0.00195254	0.0001	7.22504e-05	0.000581023		1.62637	5.10917	5.01961	4.82206	9.09158	2.35165	12.8829	14.1873	5.38182		3.46	2.88	81.64	11.9	324.2	3.61	146.82	146.82	6.41		28.9377	17.0306	5.39216	8.88502	34.1912	35.1648	6.52174	16.0535	31.6364
GSE19188	hsa:05223	153		2.9303e-41	2.74631e-36	0.242	0.0716563	0.00275786	1.32689e-15	0.0323	0.00177786	0.0597701		1.83883	3.42358	5.61765	5.13525	6.92308	2.05128	8.88963	9.27759	3.68		4.07	11.25	158.66	12.14	326.401	4.11	106.38	106.38	5.83		53.8462	61.5721	27.2059	10.9375	54.5788	42.4908	40.9699	25.0836	54.9091
GSE19728	hsa:05214	21		8.22812e-07	4.00935e-06	0.037	0.000496891	0.00148934	0.212209	0.0002	5.44918e-07	0.000295331		1.85348	2.15721	5.38235	7.36537	9.99267	1.67033	13.7191	13.913	5.25091		3.94	1.99	80.11	11.82	323.749	4.71	135.03	135.03	5.49		17.5824	24.8908	8.82353	6.69014	2.1978	36.63	15.2174	7.69231	18.9091
GSE20153	hsa:05012	16		0.514654	0.241585	0.356	0.966105	0.793881	0.716392	0.092	0.0128299	0.558101		3.33333	3.96507	4.91176	5.01287	6.66667	2.5348	8.6087	8.56856	7.29455		4.77	1.81	67.91	12	197.054	6.15	139.73	139.73	6.24		22.3443	48.4716	39.7059	97.9839	87.4539	49.8168	40.1338	23.0769	65.8182
GSE20291	hsa:05012	33		0.505109	0.285253	0.336	0.6522	0.000303281	0.0596934	0.0081	0.00190281	0.980318		2.65672	8.57642	4.69036	4.64682	7.25373	2.75373	8.9699	8.74247	8.77818		3.68	1.94	53.77	11.92	325.508	4.75	103.25	103.25	5.13		3.35821	71.179	37.3096	68.9394	1.13208	12.3134	20.903	12.709	97.0909
GSE21354	hsa:05214	17		3.21825e-10	6.34277e-09	1e-05	6.75536e-08	5.53647e-05	0.961088	0.0002	4.7503e-09	8.54858e-06		2.9011	5.03057	5.07843	6.37014	8.81319	2.23443	13.8662	14.6689	7.16364		2.7	2.22	68.5	7.37	193.738	3.29	143.56	143.56	6.37		5.12821	5.67686	2.20588	1.05634	0.735294	94.5055	14.5485	3.34448	11.6364
GSE3585	hsa:05414	12		0.108465	0.012208	0.629583	0.282008	0.281534	0.535554	0.4607	0.481974	0.478833		1.11194	5.25764	4.85279	5.25585	7.91791	1.55224	8.58863	8.37458	6.06545		17.97	2.14	41.07	13.94	319.484	31.86	98.88	98.88	4.85		72.0149	44.1048	66.4975	30.1818	60.4478	60.4478	62.8763	68.8963	62.1818
GSE4107	hsa:05210	22		2.95641e-06	8.69099e-12	0.052	0.0273394	0.0350197	0.813435	0.0003	0.00238645	0.00392247		0.388278	5.35371	4.86275	4.94844	11.2821	1.20879	9.40468	10.7358	4.77818		4.31	3.19	88.29	12.84	322.908	5.13	141.89	141.89	7.97		6.59341	0.436681	4.90196	16.0279	61.0294	87.9121	15.5518	31.4381	29.4545
GSE5281_EC	hsa:05010	21		0.00315271	0.000268368	0.246	0.393569	0.0423322	0.0211407	0.0102	0.00980316	1.25826e-06		2.69597	8.38428	5.11765	5.18434	7.2967	2.13919	7.02341	7.24415	7.08364		3.77	1.94	79.61	12.58	326.457	4.17	140.12	140.12	7.64		68.1319	76.4192	29.902	44.7552	36.2637	31.8681	19.398	23.4114	1.45455
GSE5281_HIP	hsa:05010	23		7.26956e-08	3.96652e-05	0.136	6.61329e-08	0.000489048	0.0241771	0.0001	7.0627e-13	1.74385e-14		1.56777	7.0393	5.06863	4.80087	6.96703	1.06227	8.05351	8.79599	7.61455		3.39	2.61	83.93	7.83	331.659	5.05	141.21	141.21	6.89		75.0916	74.6725	16.6667	0.34965	6.95971	40.6593	5.35117	2.00669	1.45455
GSE5281_VCX	hsa:05010	31		0.00881056	0.00357979	0.178	0.140291	0.0463842	0.111499	0.0014	0.000416375	1.14008e-07		0.10989	2.64629	5.23529	3.90296	7.39927	0.981685	7.44482	8.18729	7.28		4.29	2.72	75.31	12.41	321.269	5.12	139.66	139.66	6.75		57.1429	40.1747	21.8137	30.1754	23.1618	39.9267	10.2007	9.699	1.45455
GSE781	hsa:05211	17		0.00959107	0.0102229	0.555	0.676083	0.0982702	0.459588	0.3779	0.409184	0.297679		0.708955	6.67249	4.67005	5.03504	7.94776	2.36567	9.25753	9.59197	7.69455		3.18	1.31	50.93	7.85	348.102	3.18	99	99	4.55		12.3134	27.9476	52.7919	70.5263	46.6418	67.9104	73.5786	75.5853	54.9091
GSE8762	hsa:05016	22		0.451407	0.2163	0.19	0.151559	0.0410998	0.479828	0.0005	0.000727304	0.0573945		0.285714	4.66376	5.15686	4.524	7.42125	1.39927	8.56856	8.6087	5.73818		4.75	2.12	81.46	12.9	204.482	6.72	139.39	139.39	7.61		12.8205	47.5983	12.9902	13.308	7.32601	40.6593	4.01338	4.01338	10.9091
GSE9348	hsa:05210	82		2.84968e-34	6.60758e-39	0.012	0.333295	0.000202908	0.912771	0.0028	0.000223258	0.00078065		1.91209	6.37555	5.43137	4.09678	6.10256	1.12821	8.02676	8.28763	4.25455		4.54	8.88	113.82	13.53	193.5	6.17	134	134	5.72		6.95971	3.93013	2.20588	36.5854	11.7647	97.4359	21.7391	18.0602	17.4545
GSE9476	hsa:05221	63		0.0236476	3.20135e-09	0.019	0.581662	0.000119911	0.188689	0.0023	0.0471073	0.000144567		1.88806	7.95633	5.07614	5.27092	8.48507	1.30597	10.4482	10.2809	9.86909		4.13	2.98	69.6	13.53	205.445	6.29	92.52	92.52	5.19		34.3284	3.05677	2.03046	55.7895	0.373134	40.2985	3.17726	18.7291	0.727273
GSE6344	hsa:05211	20		2.07127e-13	4.65295e-07	0.11	0.453459	0.00309595	1.12677e-06	0.0162	0.020145	0.181684		1.43284	7.22271	5.00508	4.41024	6.69403	2.07463	7.77258	8.19398	8.56		4.53	1.23	52.14	11.49	193.908	6.61	121.58	121.58	4.67		24.6269	47.1616	14.7208	43.9024	22.9478	4.10448	27.592	22.0736	49.0909
GSE15641	hsa:05211	55		9.49756e-06	1.31713e-13	0.109	0.670025	0.00769819	0.000384723	0.1212	0.2598	0.322197		1.22388	6.69869	4.91371	4.75091	7.01493	2.29851	8.44147	8.71572	7.84727		4.01	3.3	55.25	11.89	277.365	5.78	121.75	121.75	4.61		49.6269	22.2707	17.2589	61.9792	65.2985	30.9701	41.4716	49.8328	51.6364
GSE14994	hsa:05211	30		4.61931e-07	1.05376e-09	0.278	0.0997559	0.00702436	7.90307e-05	0.0252	0.0188725	0.060009		1.79851	7.81659	5.56345	6.81086	7.70896	1.89552	10.3411	10.5819	6.24727		8.92	2.42	55.08	12.85	390.017	16.71	120.53	120.53	5.44		52.6119	57.2052	32.9949	23.9583	39.5522	26.4925	33.4448	29.097	41.0909
GSE11024	hsa:05211	22		1.61321e-13	6.74963e-20	1e-05	0.464542	0.00164286	8.45241e-06	0.0002	0.0245901	0.00204458		1.94182	6.56769	4.70874	7.13248	7.76727	1.99273	9.2107	10.796	8.42909		4.64	2.48	60.58	8.06	199.394	7.62	190.72	190.72	5.36		7.63636	0.873362	0.970874	40.5923	9.45455	14.5455	5.51839	18.3946	19.6364
			1-pi0	1	0.993987	0.995795	0.895175	0.900228	0.495413	0.979036	0.995178	0.948709	MEAN	1.69078	5.48628	5.08187	5.06697	7.69602	1.87621	9.21524	9.60129	8.60234	MEAN	4.50786	2.84357	71.6821	11.0575	289.215	6.335	132.557	132.557	5.98714	MEDIAN	23.4856	28.3843	13.8555	27.0669	19.3493	40.1126	14.8829	17.0569	18.7273
													|MEAN -5%|	3.30922	0.486276	0.081873	0.0669691	2.69602	3.12379	4.21524	4.60129	3.60234

## Sheet: Sens|FPR|TIME|PRIO_paired_data
DATA				SENSITIVIT										FPR										TIME [s]										PRIORITIZATION [%]
GEO	target path KEGG ID	sampl size		PLAGE	GLOBALTEST	PADOG	ORA	GSEA	GSVA	GST	Wlicoxon GST	CERNO		PLAGE	GLOBALTEST	PADOG	ORA	GSEA	GSVA	GST	Wlicoxon GST	CERNO		PLAGE	GLOBALTEST	PADOG	ORA	GSEA	GSVA	GST	Wlicoxon GST	CERNO		PLAGE	GLOBALTEST	PADOG	ORA	GSEA	GSVA	GST	Wlicoxon GST	CERNO
GSE1145	hsa:05414	26		7.06207e-08	NaN	0.055	0.0948043	NaN	0.294961	0.9764	0.991059	0.0190049		9.58974	NaN	4.81373	6.42909	NaN	6.86447	10.0401	10.2207	7.70182		4.37	NaN	700.12	11.16	NaN	6.2	137.1	137.1	18.17		26.3736	NaN	6.37255	16.8421	NaN	76.5568	73.5786	77.2575	22.5455
GSE14924_CD4	hsa:05221	20		2.68981e-07	NaN	0.057	0.0625709	NaN	0.515581	0.9727	0.993275	0.0463811		10.4542	NaN	5.19608	5.21851	NaN	7.34799	8.25418	8.41472	6.02182		4.46	NaN	148.51	12.76	NaN	3.64	127.96	127.96	16.2		30.7692	NaN	8.33333	9.72222	NaN	86.0806	79.9331	81.2709	33.8182
GSE14924_CD8	hsa:05221	21		1.59346e-08	NaN	0.044	0.0400838	NaN	6.60936e-08	0.9957	0.999068	0.0167251		12.3297	NaN	5.34314	5.65101	NaN	6.44689	9.02341	9.06355	8.38545		4.67	NaN	238.58	14.13	NaN	9.7	155.67	155.67	20.28		45.4212	NaN	7.59804	14.7569	NaN	10.2564	92.9766	87.9599	21.0909
GSE16759	hsa:05010	8		0.00155314	NaN	0.012	0.060577	NaN	0.000511797	0.9989	0.999889	2.49132e-05		3.17216	NaN	5.0098	5.29456	NaN	5.99267	9.31773	9.47157	8.24727		4.39	NaN	162.23	13.01	NaN	5.49	143.87	143.87	17.75		18.315	NaN	3.43137	11.4983	NaN	6.95971	94.4816	93.9799	5.81818
GSE24739_G0	hsa:05220	12		1.70003e-25	NaN	0.034	0.0126982	NaN	0.370791	0.9988	0.99993	0.0251105		21.1941	NaN	4.91176	5.26149	NaN	7.70696	7.59866	7.82609	6.75636		6.6	NaN	248.39	12.05	NaN	13.72	136.78	136.78	20.74		31.8681	NaN	5.88235	7.74648	NaN	91.5751	82.4415	83.2776	36.7273
GSE24739_G1	hsa:05220	12		0.00170824	NaN	0.127202	0.0847488	NaN	0.256436	0.917	0.955946	0.0665745		11.0403	NaN	4.71569	4.44896	NaN	8.13919	8.44147	8.56187	5.64364		3.86	NaN	80.41	12.46	NaN	3.47	142.05	142.05	18.12		86.0806	NaN	10.7843	15.331	NaN	73.9927	63.8796	69.8997	32
GSE32676	hsa:05212	32		0.000341407	NaN	0.19685	0.553422	NaN	0.970305	0.7908	0.788943	0.117963		3.22344	NaN	4.9902	5.55548	NaN	7.9707	6.96321	7.03679	5.42545		4.13	NaN	26.2	15.03	NaN	3.31	134.91	134.91	16.84		47.9853	NaN	28.4314	60.1754	NaN	97.8022	36.1204	33.4448	58.1818
GSE4183	hsa:05210	23		0.0216439	NaN	0.225806	0.0244819	NaN	0.0325877	0.9654	0.974129	0.0636397		2.21642	NaN	6.16244	4.74403	NaN	6.06716	8.94314	8.86957	5.87636		2.63	NaN	11.06	6.43	NaN	2	97.23	97.23	11.24		35.8209	NaN	28.1726	6.90909	NaN	9.70149	71.2375	73.5786	30.9091
GSE1297	hsa:05010	16		0.107447	NaN	0.113725	0.129267	NaN	0.198002	0.9785	0.976149	0.0310405		9.91791	NaN	5.7665	5.40837	NaN	7.13433	8.61538	8.62207	6.43636		3.2	NaN	29.51	6.47	NaN	2.61	94.77	94.77	11.22		33.9552	NaN	13.7056	20.8812	NaN	30.597	81.2709	80.2676	17.8182
GSE11024	hsa:05211	22		3.1837e-28	NaN	0.006	0.00729055	NaN	0.322379	1	0.999993	0.000736237		29.5238	NaN	4.96078	6.98032	NaN	14.7399	6.40134	6.32107	6.71273		6.27	NaN	208.04	12.49	NaN	9.08	134.63	134.63	19.4		2.1978	NaN	5.63725	6.64336	NaN	89.011	92.9766	89.6321	14.5455

## Sheet: Reproducibility
exactly in…	PLAGE	GLOBALTEST	PADOG	ORA	GSEA	GSVA	GeneSetTest	Wlicoxon GST	CERNO	exactly in…
1 dataset	15.901	11.4666	9.84015	11.5086	10.6254	11.3855	9.70578	9.67638	8.35783	1 dataset
2 datasets	11.4135	10.5288	7.61177	10.0347	8.78195	8.06668	6.98469	9.40343	6.28902	2 datasets
3 datasets	10.1537	9.0367	5.96288	9.23266	7.10506	8.46281	5.03345	9.13608	5.15523	3 datasets
4 datasets	9.98572	9.30545	7.35982	7.69015	6.95669	8.09888	6.06086	8.04009	5.53736	4 datasets
5 datasets	12.2953	8.99471	8.19966	10.498	9.13188	11.2959	8.32563	9.17388	7.01828	5 datasets
6 datasets	21.5461	26.3416	31.0532	26.1961	29.4687	26.3584	32.5117	27.6574	34.3705	6 datasets
Cumulative for 5 and 6 datasets	33.8414	35.3364	39.2528	36.6941	38.6005	37.6543	40.8373	36.8313	41.3888	Cumulative for 5 and 6 datasets
