# Supplementary material for: Gene set enrichment for reproducible science: comparison of CERNO and eight other algorithms
Source: Oxford University Press journal article supplement (doi:10.1093/bioinformatics/btz447), 2019-05-31

**Supplement Figure 1. Detection level of target pathways.** **A** target pathway level detection by CERNO algorithm on different gene ranking metrics. **B**, target pathway level detection across all tested algorithms. Blue color represents significantly enriched pathway (p-value <5%), red color represents not significantly enriched pathways. **C** heatmap of significantly enriched target pathways (blue color) across tested data sets and algorithms. Red color represents not significantly enriched pathways for particular data set and algorithm.

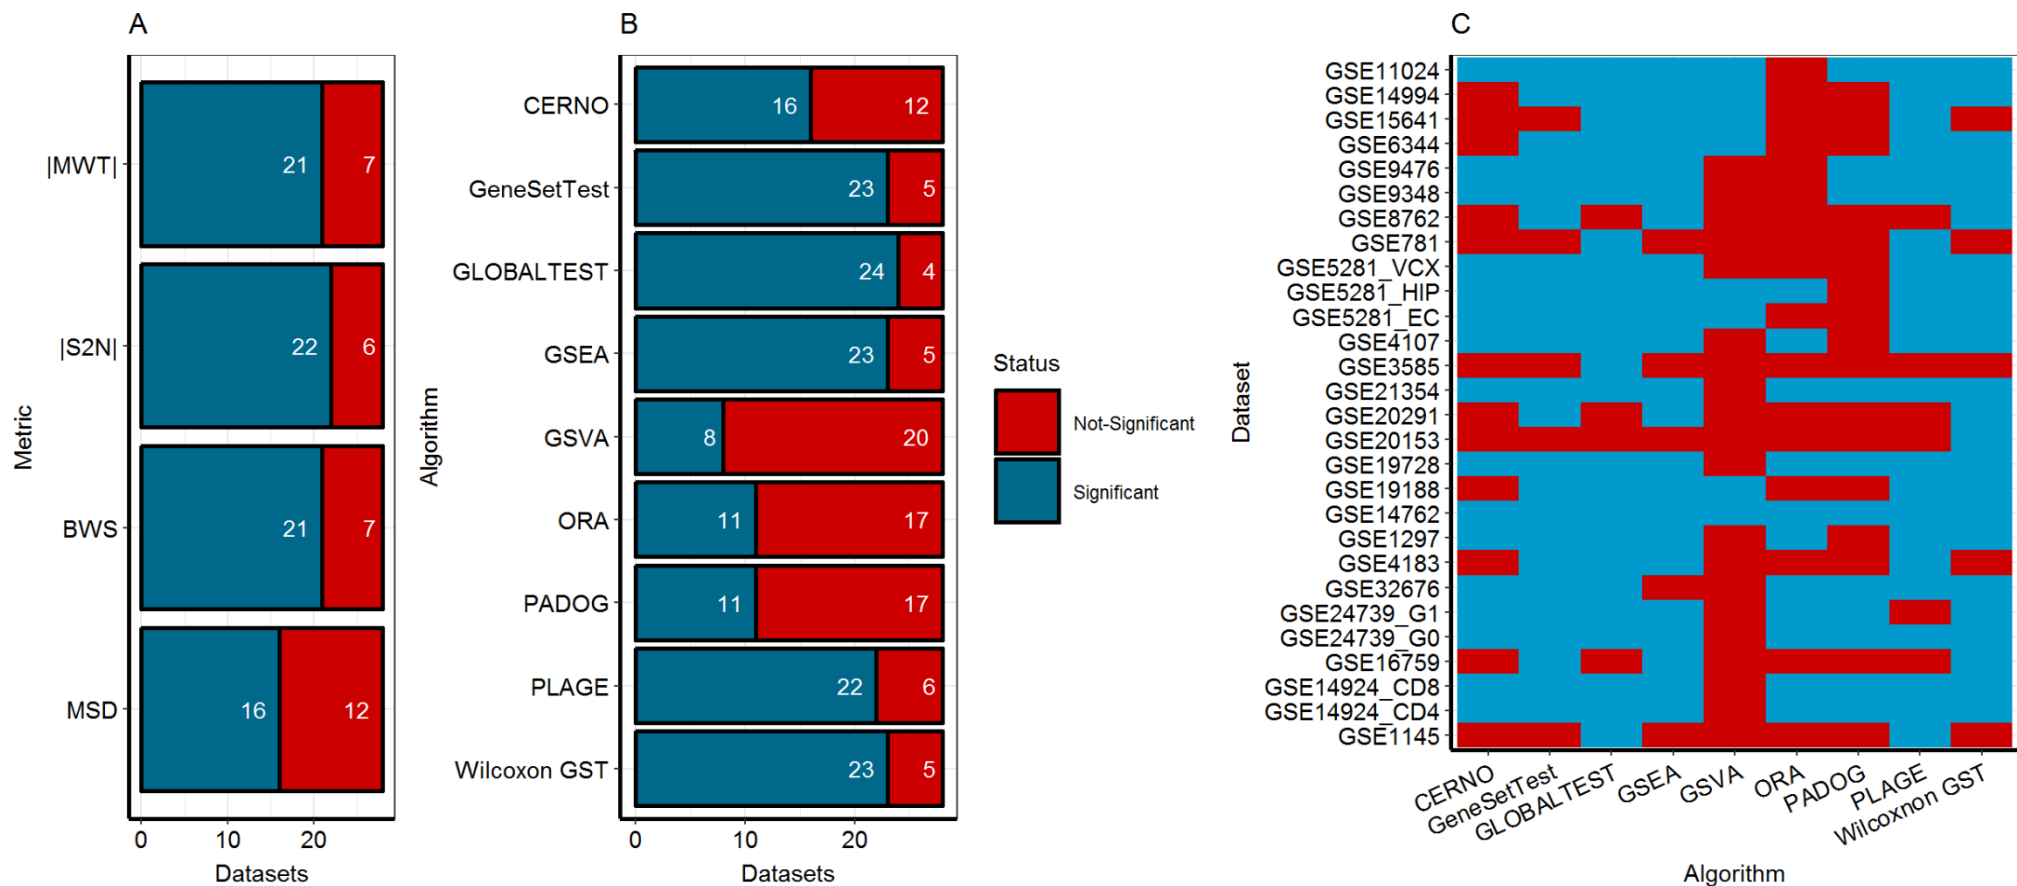

Supplement: bioinformatics_35_24_5146_s6.zip [file bioinformatics_35_24_5146_s6.zip › Supplement Figure 1.pdf]
