# Supplementary material for: Gene set enrichment for reproducible science: comparison of CERNO and eight other algorithms
Source: Oxford University Press journal article supplement (doi:10.1093/bioinformatics/btz447), 2019-05-31

**Supplement Figure 2. Graphical representation of each evaluation metric for analyzed data sets.** **A**, distribution of surrogate sensitivity for each algorithm. **B**, distribution of false positive rate [%], where red line show expected level. **C**, distribution of computational evaluation time in seconds of each tested method. **D**, distribution of prioritization in [%], where red line represents half of ranking list. **E**, obtained reproducibility as AUC in [%].

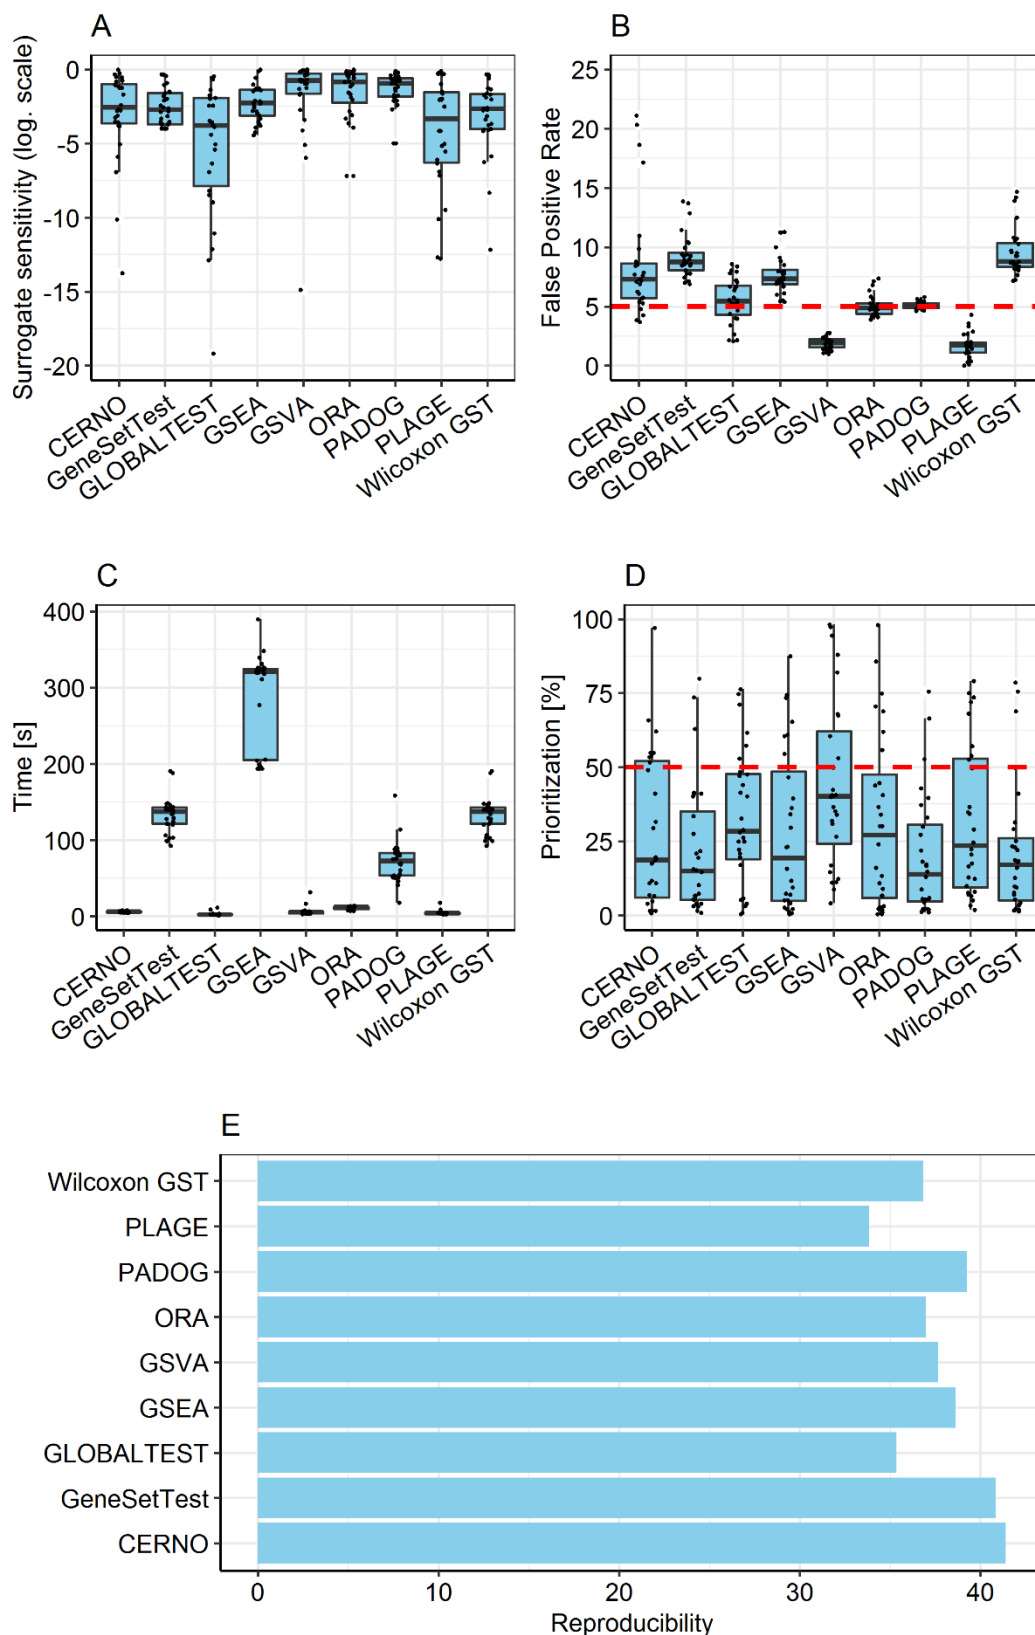

Supplement: bioinformatics_35_24_5146_s6.zip [file bioinformatics_35_24_5146_s6.zip › Supplement Figure 2.pdf]
