# Supplementary material for: Gene set enrichment for reproducible science: comparison of CERNO and eight other algorithms
Source: Oxford University Press journal article supplement (doi:10.1093/bioinformatics/btz447), 2019-05-31

**Supplement Figure 4. Relation between target pathway p-value and data set sample size in each tested algorithm.** Blue dots represents observed outcomes, black dashed line shows linear regression model while blue area represents its 95% confidence interval. To each dependency, Spearman rank correlation coefficient (corr.) with its p-value (p-val) for equality to zero testing is included. Both scales are presented as log10 of original value.

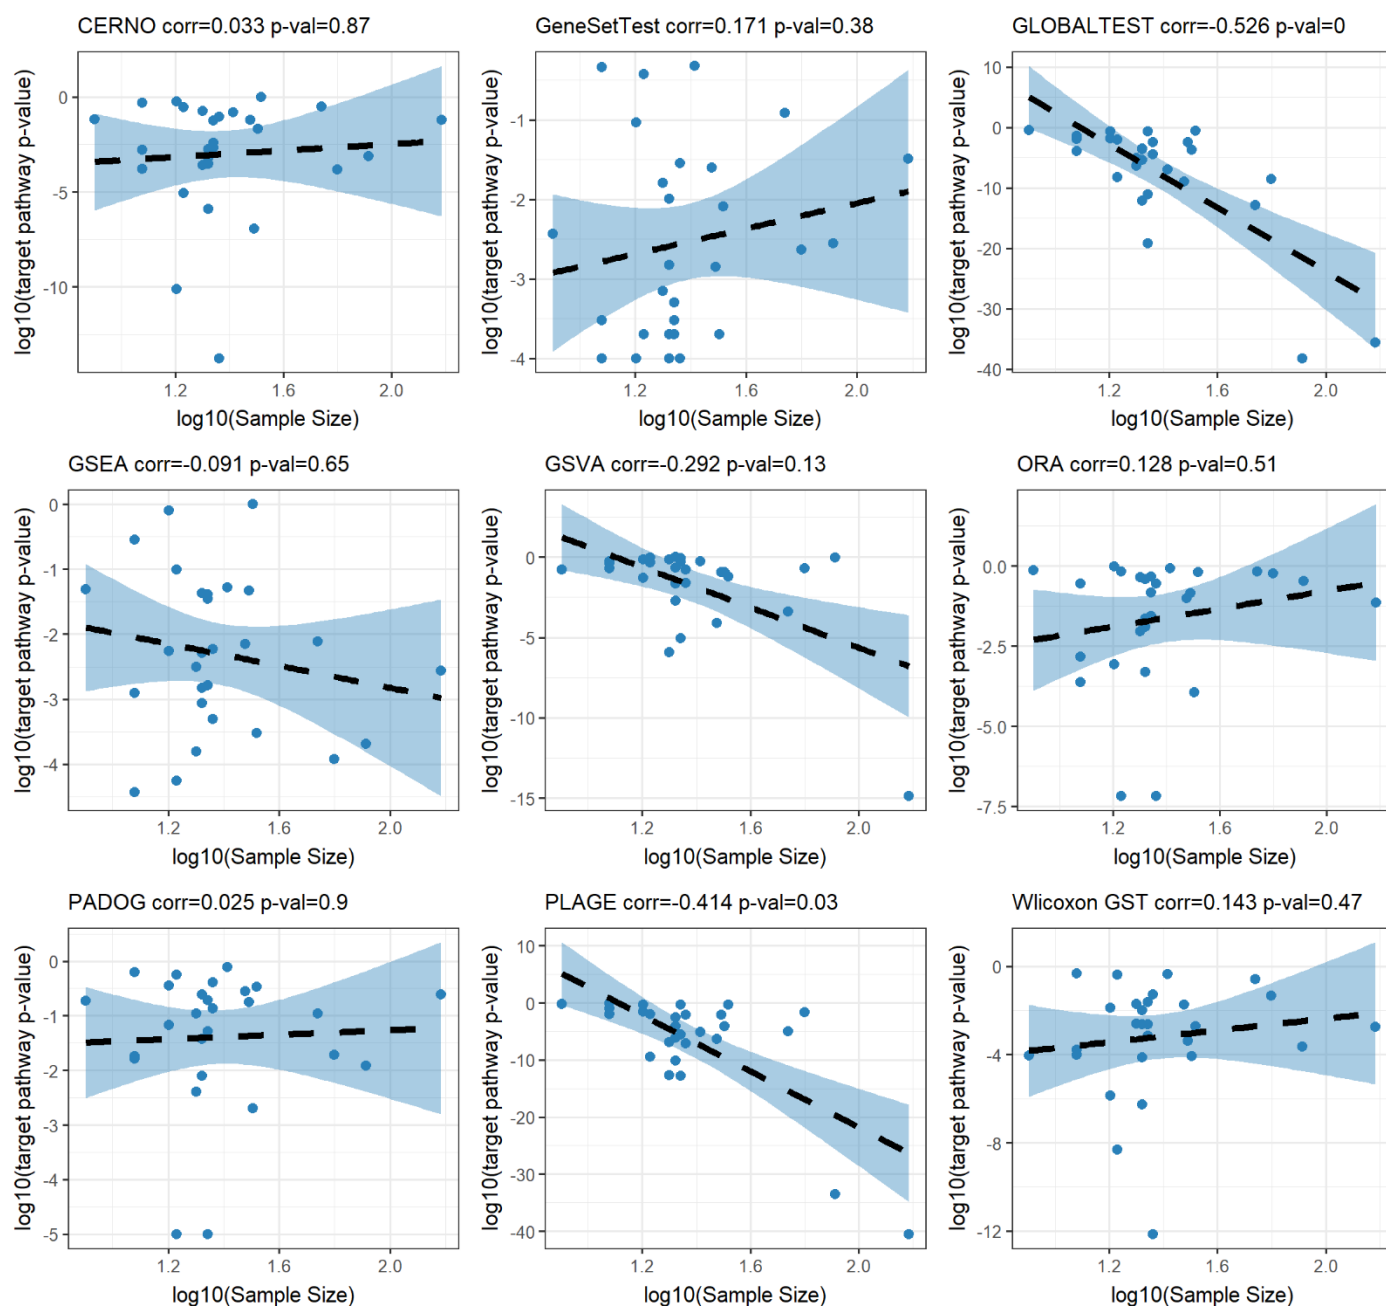

Supplement: bioinformatics_35_24_5146_s6.zip [file bioinformatics_35_24_5146_s6.zip › Supplement Figure 4.pdf]
