# Supplementary material for: Gene set enrichment for reproducible science: comparison of CERNO and eight other algorithms
Source: Oxford University Press journal article supplement (doi:10.1093/bioinformatics/btz447), 2019-05-31

**Supplement Figure 6. Relation between false positive rate and data set sample size in each tested algorithm.** Blue dots represent observed outcomes, black dashed line show linear regression model while blue area represent its 95% confidence interval. To each dependency, Spearman rank correlation coefficient (corr.) with its p-value (p-val) for equality to zero testing is included. X axis scale is presented as log10 of original value.

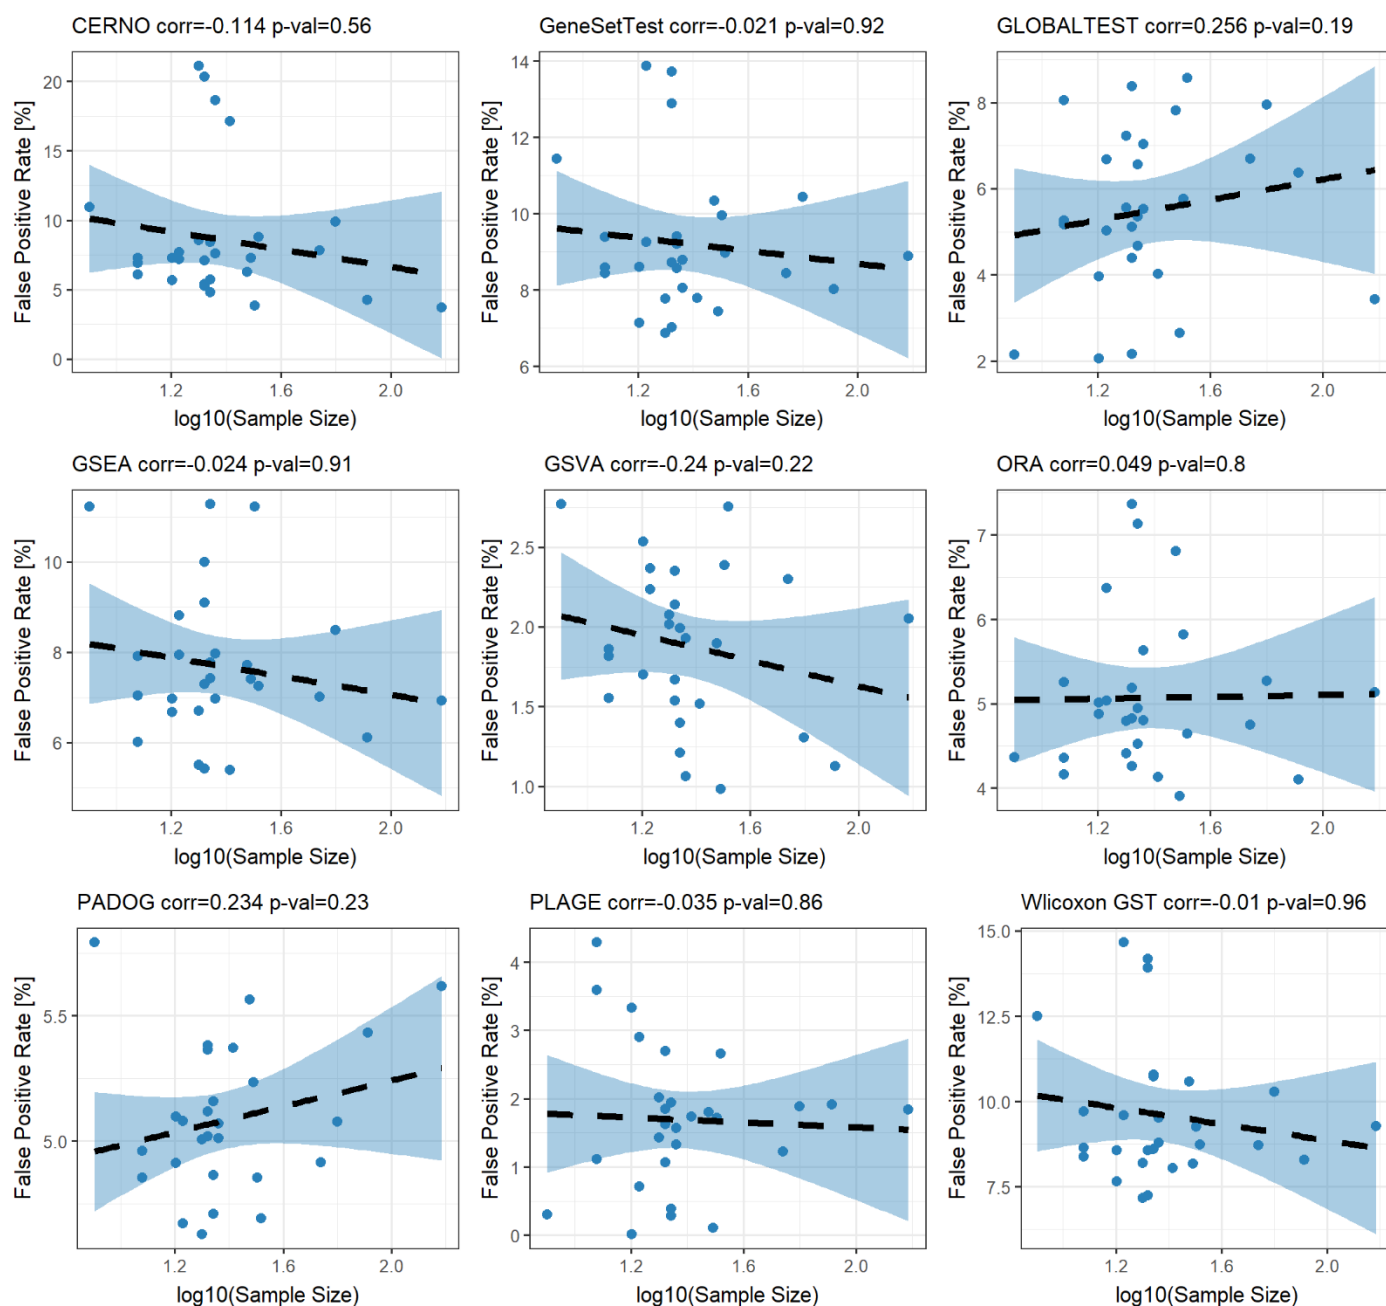

Supplement: bioinformatics_35_24_5146_s6.zip [file bioinformatics_35_24_5146_s6.zip › Supplement Figure 6.pdf]
