# Supplementary material for: Gene set enrichment for reproducible science: comparison of CERNO and eight other algorithms
Source: Oxford University Press journal article supplement (doi:10.1093/bioinformatics/btz447), 2019-05-31

**Supplement Figure 7. Cluster heatmap of normalized evaluation statistics on all possible datasets.** Blue color represents good, grey medium and red poor evaluation. Numbers next to the algorithms name represent the overall rank from the best (1) to the worst (9) performance. Dendrogram corresponds to hierarchical clustering based on Euclidian distance.

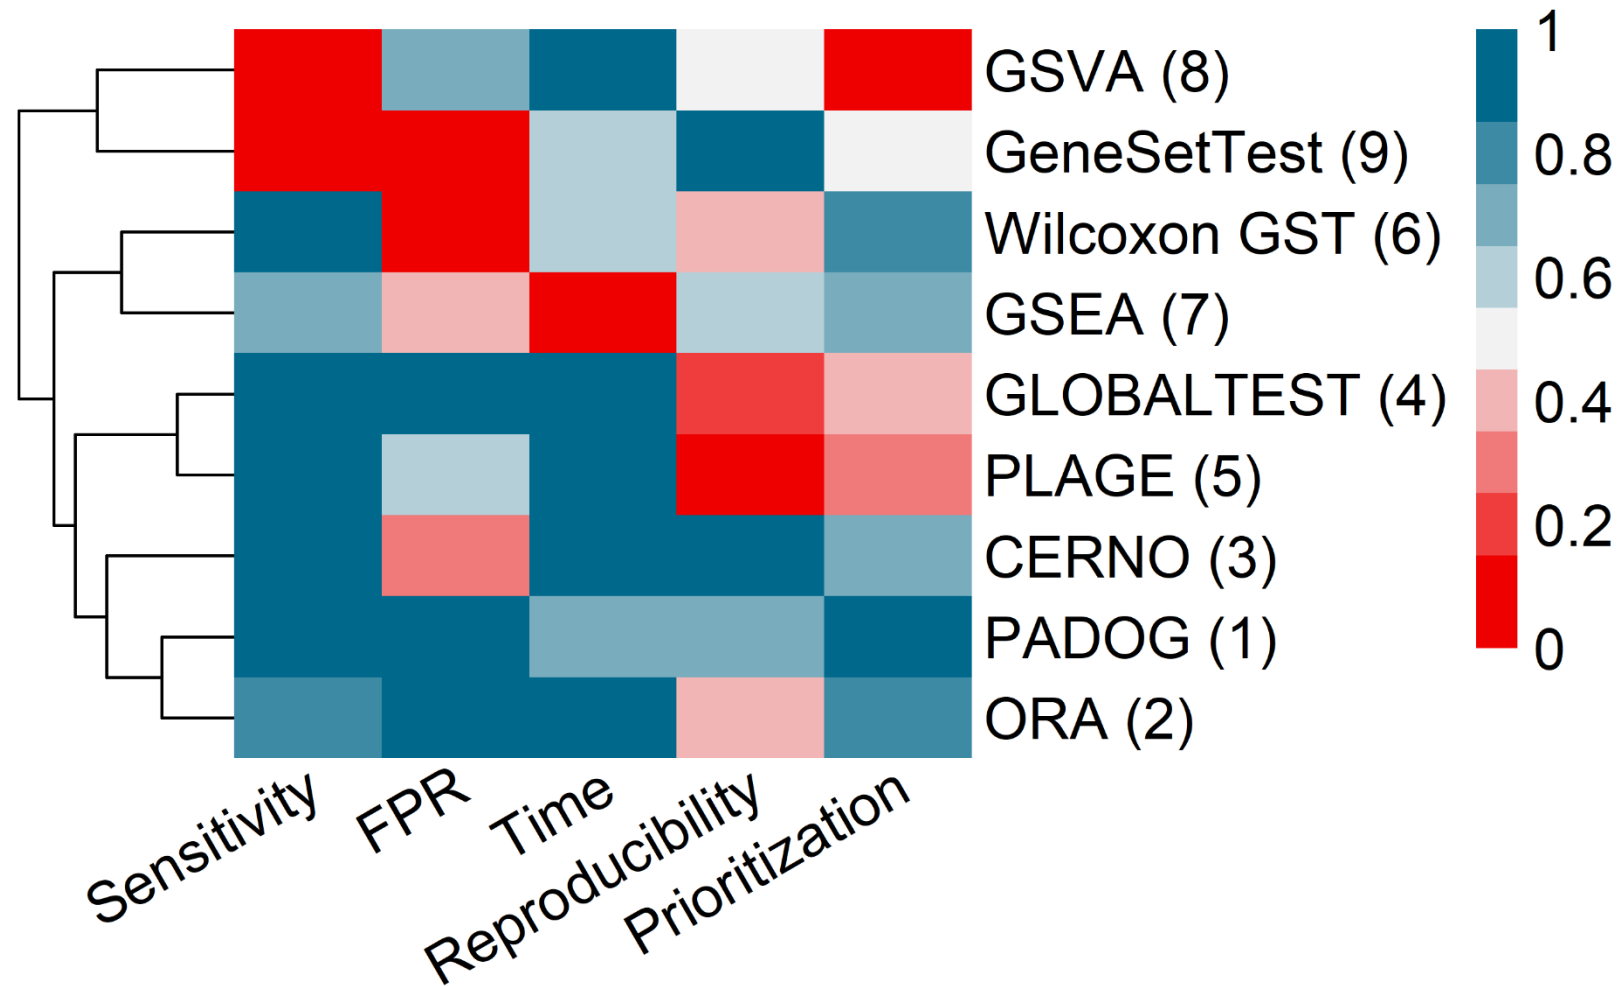

Supplement: bioinformatics_35_24_5146_s6.zip [file bioinformatics_35_24_5146_s6.zip › Supplement Figure 7.pdf]
