# Supplementary material for: Gene set enrichment for reproducible science: comparison of CERNO and eight other algorithms
Source: Oxford University Press journal article supplement (doi:10.1093/bioinformatics/btz447), 2019-05-31

**Supplement Figure 8. P-value correlations between each algorithms.** **A**, correlation of corresponding pathway p-values obtained on ccRCC results for 189 pathway in 6 data sets. **B**, correlation of corresponding pathways p-value calculated only for target pathways from 28 benchmark data sets. Dark red color corresponds to high correlation, while blue represents lack of correlation between resulted p-values of each algorithms

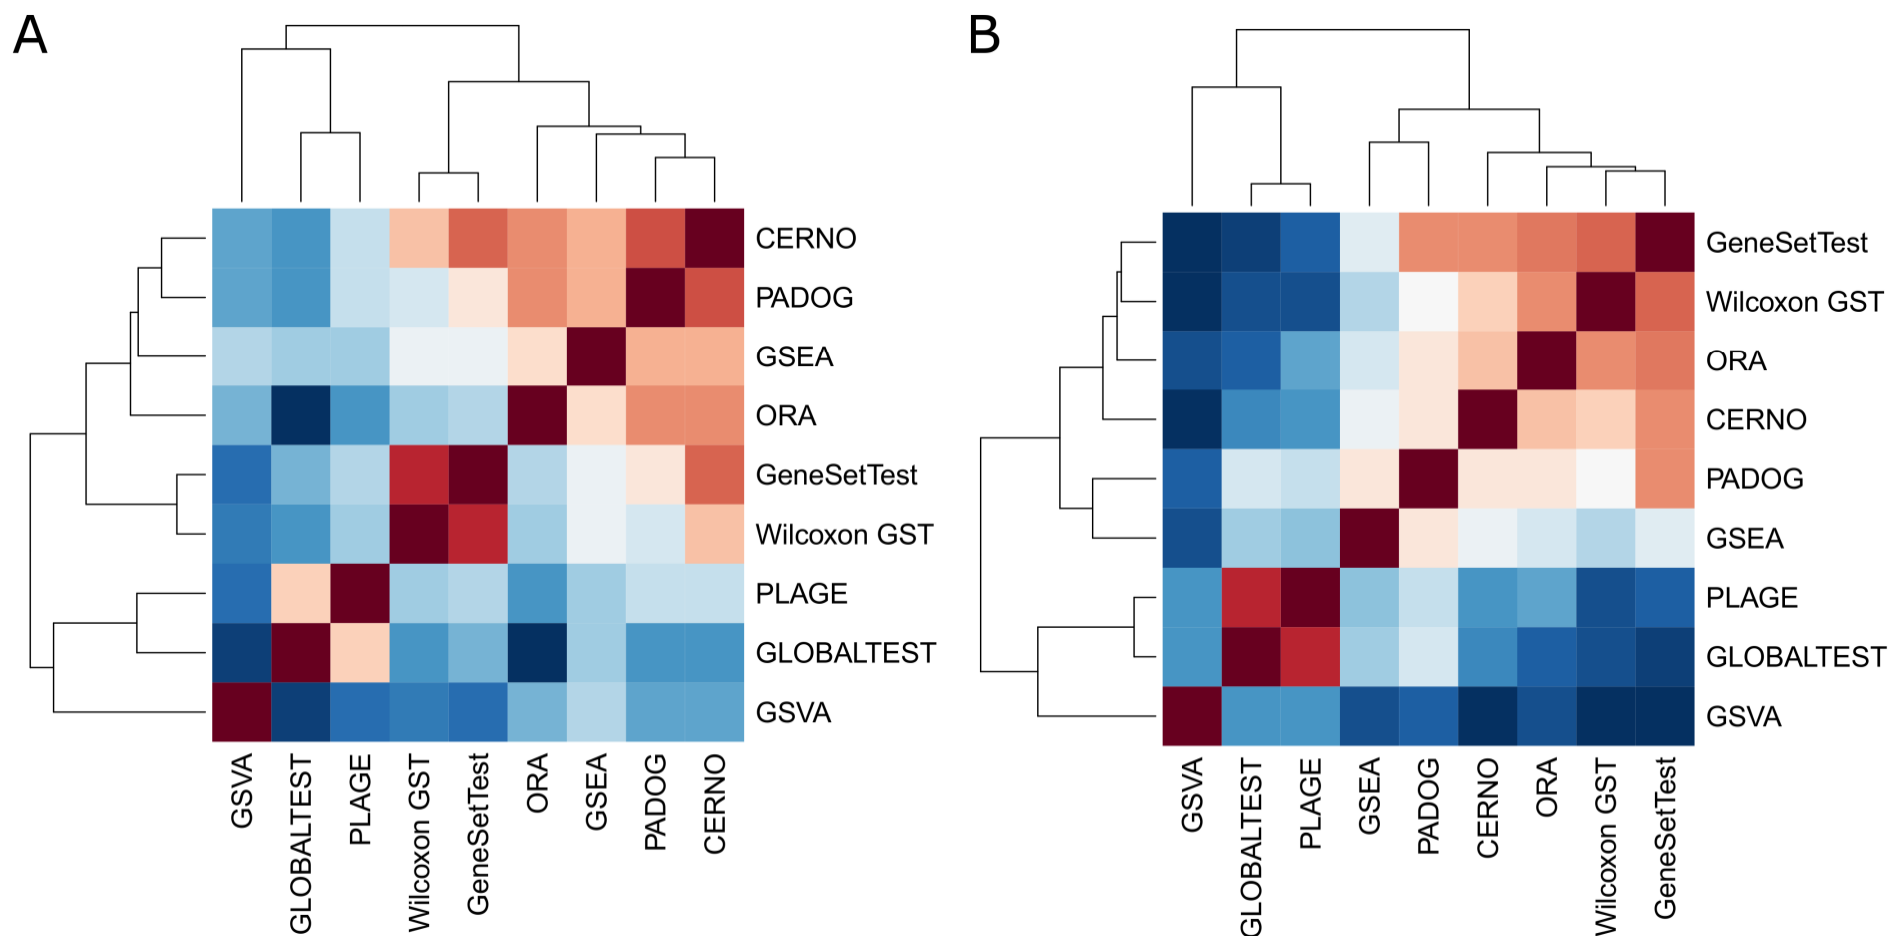

Supplement: bioinformatics_35_24_5146_s6.zip [file bioinformatics_35_24_5146_s6.zip › Supplement Figure 8.pdf]
